# Supplementary material
Source: publisher figshare collection journal article supplement (https://gsapubs.figshare.com/articles/dataset/_/13392794)

Licheng Cao, Tao Jiang, and Jingke He, 2020, Fingerprinting sand from Asian rivers to the deep central South China Sea since the Late Miocene: GSA Bulletin, <https://doi.org/10.1130/B35845.1>.

## Supplemental Material

**Figure S1.** Magmatic provenance diagrams (Grimes et al., 2007; Grimes et al., 2015) for zircons from sites U1431 and U1432. Samples are grouped according to their stratigraphic positions and zircon age signatures.

**Table S1.** Geographic location, stratigraphic context, and lithology of the samples from sites U1431 and U1432 for heavy mineral analysis and detrital zircon U-Pb dating. The depositional ages of samples are estimated assuming a constant sedimentation rate for each stratigraphic unit (Fig. 2). mbsf—meters below seafloor.

**Table S2.** Relative abundances of non-opaque detrital heavy minerals of the Upper Miocene to Pleistocene samples from sites U1431 and U1432.

**Table S3.** U-Pb geochronological results, elemental concentrations, grain size and shape measurements of detrital zircons from sites U1431 and U1432. Only ages with  $\leq 10\%$  discordance and  $\leq 10\%$  uncertainty ( $1\sigma$ ) are shown here. Discordance tests for zircons older and younger than 1000 Ma are calculated by  $[1 - (^{206}\text{Pb}/^{238}\text{U} \text{ age} / ^{207}\text{Pb}/^{206}\text{Pb} \text{ age})] * 100$  and  $[1 - (^{206}\text{Pb}/^{238}\text{U} \text{ age} / ^{207}\text{Pb}/^{235}\text{U} \text{ age})] * 100$ , respectively. Aspect Ratio = Major axis/Minor axis. Circularity =  $4\pi * \text{Area} / (\text{Perimeter})^2$ . Roundness =  $4 * \text{Area} / [\pi * (\text{Major axis})^2]$ . Effective diameter =  $2 * (\text{Area} / \pi)^{1/2}$ . Nominal diameter =  $(\text{Major axis} * \text{Intermediate axis} * \text{Minor axis})^{1/3}$ , assuming Intermediate axis equal to Minor axis (Garzanti et al., 2008; Lawrence et al., 2011).

**Table S4.** Compilation of published detrital zircon U-Pb ages along with sampling information and references from the Upper Miocene to Pleistocene samples in the South China Sea region. Samples are grouped according to their geographic locations, including the Western Foothills and Hengchun Peninsula of Taiwan (Chen et al., 2017; Kirstein et al., 2010; Lan et al., 2016; Zhang et al., 2014; Zhang et al., 2017), the Central Depression of the Qiongdongnan Basin (Cao et al., 2015; Chen et al., 2015; Li et al., 2019; Shao et al., 2018), the Central Depression of the Yinggehai Basin (Cao et al., 2015; Jiang et al., 2015; Wang et al., 2018; Wang et al., 2014; Xie et al., 2016; Yan et al., 2011), the Da Lat Zone of Southeast Vietnam (Hennig et al., 2018), South Palawan (Cao et al., 2020; Suggate et al., 2014; Yan et al., 2018b), and the Miri Zone of Northwest Borneo (Hennig-Breitfeld et al., 2019). Published age data, if available, are filtered with a cutoff criterion of  $\leq 10\%$  discordance and  $\leq 10\%$  uncertainty ( $1\sigma$ ). The filtered age data set of each sample group with a relatively limited number of analyses (e.g., Upper Miocene of Pearl River Mouth Basin; Yan et al., 2018a) is omitted.

**Table S5.** Pearson correlation results of age, elemental concentration and ratio, grain size and shape of zircons from sites U1431 and U1432. Samples are grouped according to their stratigraphic positions and zircon age signatures. The correlation coefficient (r) and probability (p) values are shown at the bottom left and top right of each matrix, respectively. Coefficient

values with  $|r| > 0.7$  at the significance level of 0.01 (dark yellow) and 0.05 (light yellow) on two-tailed test are indicated in bold font.

**Table S6.** Compilation of published detrital zircon U-Pb ages along with sampling information and references from drainage sediments and bedrocks of modern potential provenances surrounding the South China Sea. Samples are grouped into 11 source areas, including West Taiwan (Chen et al., 2019; Deng et al., 2017), Coastal Southeast China (Chen et al., 2019; Xu et al., 2014b; Zhang et al., 2017), Pearl River (He et al., 2020; Liu et al., 2017; Xu et al., 2007; Zhao et al., 2015), Hainan (Cao et al., 2015; Wang et al., 2015; Xu et al., 2014a), Red River (Bodet and Schärer, 2000; Clift et al., 2006; Fyhn et al., 2019; Hoang et al., 2009; Wang et al., 2018), North Palawan (Cao et al., 2020; Padrones et al., 2017; Shao et al., 2017; Suggate et al., 2014; Walia et al., 2012), East Vietnam (Fyhn et al., 2019; Jonell et al., 2017; Usuki et al., 2013; Wang et al., 2018), Mekong River (Bodet and Schärer, 2000; Clift et al., 2006), Northwest Borneo (Breitfeld and Hall, 2018; Breitfeld et al., 2017; Breitfeld et al., 2020; Galin et al., 2017; Hennig-Breitfeld et al., 2019), Malay Peninsula (Sevastjanova et al., 2011), Southeast Sumatra (Zhang et al., 2019). Published age data, if available, are filtered with a cutoff criterion of  $\leq 10\%$  discordance and  $\leq 10\%$  uncertainty ( $1\sigma$ ). Age data are preferentially compiled from drainage sediments that discharge into the South China Sea instead of bedrocks unless the former are unavailable (i.e., in North Palawan and Northwest Borneo). The two tectonic units along the eastern Indochina margin, Truong Son Belt and Kontum Massif, are together defined as the East Vietnam Provenance (Nagy et al., 2001; Ngoc Nam, 1998) because their zircon age distribution patterns are largely comparable albeit with a certain degree of variation among different mountainous rivers. Likewise, the tectonic units of Miri, Sibul, and Kuching zones of Borneo are grouped as the Northwest Borneo provenance.

**Table S7.** Summary of the inverse Monte Carlo mixture model results of detrital zircon U-Pb age data of the upper Upper Miocene to Pleistocene samples from sites U1431 and U1432. Potential provenances with blank values of relative contribution and standard deviation ( $1\sigma$ ) are those not included in the modeling. The goodness-of-fit metric of the model is calculated by the cross-correlation coefficient of KDE spectra between observed and modeled data (10,000 trials).

## REFERENCES CITED

- Bodet, F., and Schärer, U., 2000, Evolution of the SE-Asian continent from U-Pb and Hf isotopes in single grains of zircon and baddeleyite from large rivers: *Geochimica et Cosmochimica Acta*, v. 64, no. 12, p. 2067–2091, [https://doi.org/10.1016/S0016-7037\(00\)00352-5](https://doi.org/10.1016/S0016-7037(00)00352-5).
- Breitfeld, H.T., Hall, R., Galin, T., Forster, M.A., and BouDagher-Fadel, M.K., 2017, A Triassic to Cretaceous Sundaland–Pacific subduction margin in West Sarawak, Borneo: *Tectonophysics*, v. 694, p. 35–56, <https://doi.org/10.1016/j.tecto.2016.11.034>.
- Breitfeld, H.T., and Hall, R., 2018, The eastern Sundaland margin in the latest Cretaceous to Late Eocene: Sediment provenance and depositional setting of the Kuching and Sibul Zones of Borneo: *Gondwana Research*, v. 63, p. 34–64, <https://doi.org/10.1016/j.gr.2018.06.001>.
- Breitfeld, H.T., Hennig-Breitfeld, J., BouDagher-Fadel, M.K., Hall, R., and Galin, T., 2020, Oligocene-Miocene drainage evolution of NW Borneo: Stratigraphy, sedimentology and

- provenance of Tatau-Nyalau province sediments: *Journal of Asian Earth Sciences*, v. 195, p. 104331, <https://doi.org/10.1016/j.jseaes.2020.104331>.
- Cao, L., Jiang, T., Wang, Z., Zhang, Y., and Sun, H., 2015, Provenance of Upper Miocene sediments in the Yinggehai and Qiongdongnan basins, northwestern South China Sea: Evidence from REE, heavy minerals and zircon U–Pb ages: *Marine Geology*, v. 361, p. 136–146, <https://doi.org/10.1016/j.margeo.2015.01.007>.
- Cao, L., Shao, L., Qiao, P., Cui, Y., Zhang, G., and Zhang, X., 2020, Formation and paleogeographic evolution of the Palawan Continental Terrane along the Southeast Asian margin revealed by detrital fingerprints: *Geological Society of America Bulletin*, v. 132, <https://doi.org/10.1130/B35707.1>.
- Chen, C.-H., Lee, C.-Y., Lin, J.-W., and Chu, M.-F., 2019, Provenance of sediments in western Foothills and Hsuehshan Range (Taiwan): A new view based on the EMP monazite versus LA-ICPMS zircon geochronology of detrital grains: *Earth-Science Reviews*, v. 190, p. 224–246, <https://doi.org/10.1016/j.earscirev.2018.12.015>.
- Chen, H., Xie, X., Guo, J., Su, M., Zong, K., Shang, F., Huang, W., Wang, W., and Shang, Z., 2015, Provenance of Central Canyon in Qiongdongnan Basin as evidenced by detrital zircon U–Pb study of Upper Miocene sandstones: *Science China. Earth Sciences*, v. 58, no. 8, p. 1337–1349, <https://doi.org/10.1007/s11430-014-5038-6>.
- Chen, W.-S., Chung, S.-L., Chou, H.-Y., Zuo, Z., Shao, W.-Y., and Lee, Y.-H., 2017, A reinterpretation of the metamorphic Yuli belt: Evidence for a middle-late Miocene accretionary prism in eastern Taiwan: *Tectonics*, v. 36, no. 2, p. 188–206, <https://doi.org/10.1002/2016TC004383>.
- Clift, P.D., Carter, A., Campbell, I.H., Pringle, M.S., Van Lap, N., Allen, C.M., Hodges, K.V., and Tan, M.T., 2006, Thermochronology of mineral grains in the Red and Mekong Rivers, Vietnam: provenance and exhumation implications for Southeast Asia: *Geochemistry Geophysics Geosystems*, v. 7, no. 10, Q10005, <https://doi.org/10.1029/2006GC001336>.
- Deng, K., Yang, S., Li, C., Su, N., Bi, L., Chang, Y.-P., and Chang, S.-C., 2017, Detrital zircon geochronology of river sands from Taiwan: Implications for sedimentary provenance of Taiwan and its source link with the east China mainland: *Earth-Science Reviews*, v. 164, p. 31–47, <https://doi.org/10.1016/j.earscirev.2016.10.015>.
- Fyhn, M.B.W., Thomsen, T.B., Keulen, N., Knudsen, C., Rizzi, M., Bojesen-Koefoed, J., Olivarius, M., Tri, T.V., Phach, P.V., Minh, N.Q., Abatzis, I., and Nielsen, L.H., 2019, Detrital zircon ages and heavy mineral composition along the Gulf of Tonkin - Implication for sand provenance in the Yinggehai-Song Hong and Qiongdongnan basins: *Marine and Petroleum Geology*, v. 101, p. 162–179, <https://doi.org/10.1016/j.marpetgeo.2018.11.051>.
- Galin, T., Breitfeld, H.T., Hall, R., and Sevastjanova, I., 2017, Provenance of the Cretaceous–Eocene Rajang Group submarine fan, Sarawak, Malaysia from light and heavy mineral assemblages and U–Pb zircon geochronology: *Gondwana Research*, v. 51, p. 209–233, <https://doi.org/10.1016/j.gr.2017.07.016>.
- Garzanti, E., Andò, S., and Vezzoli, G., 2008, Settling equivalence of detrital minerals and grain-size dependence of sediment composition: *Earth and Planetary Science Letters*, v. 273, no. 1–2, p. 138–151, <https://doi.org/10.1016/j.epsl.2008.06.020>.
- Grimes, C.B., John, B.E., Kelemen, P.B., Mazdab, F.K., Wooden, J.L., Cheadle, M.J., Hanghøj, K., and Schwartz, J.J., 2007, Trace element chemistry of zircons from oceanic crust: A method for distinguishing detrital zircon provenance: *Geology*, v. 35, no. 7, p. 643–646, <https://doi.org/10.1130/G23603A.1>.

- Grimes, C.B., Wooden, J.L., Cheadle, M.J., and John, B.E., 2015, “Fingerprinting” tectono-magmatic provenance using trace elements in igneous zircon: *Contributions to Mineralogy and Petrology*, v. 170, p. 46, <https://doi.org/10.1007/s00410-015-1199-3>.
- He, J., Garzanti, E., Cao, L.C., and Wang, H., 2020, The zircon story of the Pearl River (China) from Cretaceous to present: *Earth-Science Reviews*, v. 201, p. 103078, <https://doi.org/10.1016/j.earscirev.2019.103078>.
- Hennig-Breitfeld, J., Breitfeld, H.T., Hall, R., BouDagher-Fadel, M., and Thirlwall, M., 2019, A new upper Paleogene to Neogene stratigraphy for Sarawak and Labuan in northwestern Borneo: Paleogeography of the eastern Sundaland margin: *Earth-Science Reviews*, v. 190, p. 1–32, <https://doi.org/10.1016/j.earscirev.2018.12.006>.
- Hennig, J., Breitfeld, H.T., Gough, A., Hall, R., Long, T.V., Kim, V.M., and Quang, S.D., 2018, U-Pb zircon ages and provenance of Upper Cenozoic sediments from the Da Lat Zone, SE Vietnam: Implications for an intra-Miocene unconformity and paleo-drainage of the Proto-Mekong River: *Journal of Sedimentary Research*, v. 88, no. 4, p. 495–515, <https://doi.org/10.2110/jsr.2018.26>.
- Hoang, L.V., Wu, F., Clift, P.D., Wysocka, A., and Swierczewska, A., 2009, Evaluating the evolution of the Red River system based on in situ U–Pb dating and Hf isotope analysis of zircons: *Geochemistry Geophysics Geosystems*, v. 10, no. 11, Q11008, <https://doi.org/10.1029/2009GC002819>.
- Jiang, T., Cao, L., Xie, X., Wang, Z., Li, X., Zhang, Y., Zhang, D., and Sun, H., 2015, Insights from heavy minerals and zircon U–Pb ages into the middle Miocene–Pliocene provenance evolution of the Yinggehai Basin, northwestern South China Sea: *Sedimentary Geology*, v. 327, p. 32–42, <https://doi.org/10.1016/j.sedgeo.2015.07.011>.
- Jonell, T.N., Clift, P.D., Hoang, L.V., Hoang, T., Carter, A., Wittmann, H., Böning, P., Pahnke, K., and Rittenour, T., 2017, Controls on erosion patterns and sediment transport in a monsoonal, tectonically quiescent drainage, Song Gianh, central Vietnam: *Basin Research*, v. 29, p. 659–683, <https://doi.org/10.1111/bre.12199>.
- Kirstein, L.A., Carter, A., and Chen, Y.-G., 2010, Testing inferences from palaeocurrents: application of zircon double-dating to Miocene sediments from the Hengchun Peninsula, Taiwan: *Terra Nova*, v. 22, no. 6, p. 483–493, <https://doi.org/10.1111/j.1365-3121.2010.00970.x>.
- Lan, Q., Yan, Y., Huang, C.-Y., Santosh, M., Shan, Y.-H., Chen, W., Yu, M., and Qian, K., 2016, Topographic architecture and drainage reorganization in Southeast China: Zircon U–Pb chronology and Hf isotope evidence from Taiwan: *Gondwana Research*, v. 36, p. 376–389, <https://doi.org/10.1016/j.gr.2015.07.008>.
- Lawrence, R.L., Cox, R., Mapes, R.W., and Coleman, D.S., 2011, Hydrodynamic fractionation of zircon age populations: *Geological Society of America Bulletin*, v. 123, no. 1–2, p. 295–305, <https://doi.org/10.1130/B30151.1>.
- Li, C., Lyu, C., Chen, G., Zhang, G., Ma, M., Yang, H., and Bi, G., 2019, Zircon U–Pb ages and REE composition constraints on the provenance of the continental slope-parallel submarine fan, western Qiongdongnan Basin, northern margin of the South China Sea: *Marine and Petroleum Geology*, v. 102, p. 350–362, <https://doi.org/10.1016/j.marpetgeo.2018.12.046>.
- Liu, C., Clift, P.D., Carter, A., Böning, P., Hu, Z., Sun, Z., and Pahnke, K., 2017, Controls on modern erosion and the development of the Pearl River drainage in the late Paleogene: *Marine Geology*, v. 394, p. 52–68, <https://doi.org/10.1016/j.margeo.2017.07.011>.

- Nagy, E.A., Maluski, H., Thi, P.T., Lepvrier, C., Leyreloup, A., Schärer, U., and Thich, V.V., 2001, Geodynamic significance of the Kontum Massif in Central Vietnam: Composite  $^{40}\text{Ar}/^{39}\text{Ar}$  and U-Pb ages from Paleozoic to Triassic: *The Journal of Geology*, v. 109, no. 6, p. 755–770, <https://doi.org/10.1086/323193>.
- Ngoc Nam, T., 1998, Thermotectonic events from Eearly Proterozoic to Miocene in the Indochina craton: implication of K-Ar ages in Vietnam: *Journal of Asian Earth Sciences*, v. 16, no. 5–6, p. 475–484, [https://doi.org/10.1016/S0743-9547\(98\)00027-0](https://doi.org/10.1016/S0743-9547(98)00027-0).
- Padrones, J.T., Tani, K., Tsutsumi, Y., and Imai, A., 2017, Imprints of Late Mesozoic tectono-magmatic events on Palawan Continental Block in northern Palawan, Philippines: *Journal of Asian Earth Sciences*, v. 142, p. 56–76, <https://doi.org/10.1016/j.jseaes.2017.01.027>.
- Sevastjanova, I., Clements, B., Hall, R., Belousova, E.A., Griffin, W.L., and Pearson, N., 2011, Granitic magmatism, basement ages, and provenance indicators in the Malay Peninsula: Insights from detrital zircon U–Pb and Hf-isotope data: *Gondwana Research*, v. 19, no. 4, p. 1024–1039, <https://doi.org/10.1016/j.gr.2010.10.010>.
- Shao, L., Cao, L., Qiao, P., Zhang, X., Li, Q., and van Hinsbergen, D.J.J., 2017, Cretaceous–Eocene provenance connections between the Palawan Continental Terrane and the northern South China Sea margin: *Earth and Planetary Science Letters*, v. 477, p. 97–107, <https://doi.org/10.1016/j.epsl.2017.08.019>.
- Shao, L., Cui, Y., Stattegger, K., Zhu, W., Qiao, P., and Zhao, Z., 2018, Drainage control of Eocene to Miocene sedimentary records in the southeastern margin of Eurasian Plate: *Geological Society of America Bulletin*, v. 131, no. 3–4, p. 461–478, <http://doi.org/10.1130/b32053.1>.
- Suggate, S.M., Cottam, M.A., Hall, R., Sevestjanova, I., Forster, M.A., White, L.T., Armstrong, R.A., Carter, A., and Mojares, E., 2014, South China continental margin signature for sandstones and granites from Palawan, Philippines: *Gondwana Research*, v. 26, no. 2, p. 699–718, <https://doi.org/10.1016/j.gr.2013.07.006>.
- Usuki, T., Lan, C.-Y., Wang, K.-L., and Chiu, H.-Y., 2013, Linking the Indochina block and Gondwana during the Early Paleozoic: Evidence from U–Pb ages and Hf isotopes of detrital zircons: *Tectonophysics*, v. 586, p. 145–159, <https://doi.org/10.1016/j.tecto.2012.11.010>.
- Walia, M., Knittel, U., Suzuki, S., Chung, S.-L., Pena, R.E., and Yang, T.F., 2012, No Paleozoic metamorphics in Palawan (the Philippines)? Evidence from single grain U–Pb dating of detrital zircons: *Journal of Asian Earth Sciences*, v. 52, p. 134–145, <https://doi.org/10.1016/j.jseaes.2012.03.005>.
- Wang, C., Liang, X., Xie, Y., Tong, C., Pei, J., Zhou, Y., Jiang, Y., Fu, J., Dong, C., and Liu, P., 2014, Provenance of Upper Miocene to Quaternary sediments in the Yinggehai–Song Hong Basin, South China Sea: evidence from detrital zircon U–Pb ages: *Marine Geology*, v. 355, p. 202–217, <https://doi.org/10.1016/j.margeo.2014.06.004>.
- Wang, C., et al., 2015, Construction of age frequencies of provenances on the eastern side of the Yinggehai Basin: Studies of LA-ICP-MS U–Pb ages of detrital zircons from six modern rivers, western Hainan, China [in Chinese with English abstract]: *Earth Science Frontiers*, v. 22, no. 4, p. 277–289, <http://doi.org/10.13745/j.esf.2015.04.028>.
- Wang, C., Liang, X., Foster, D.A., Tong, C., Liu, P., Liang, X., and Zhang, L., 2018, Linking source and sink: Detrital zircon provenance record of drainage systems in Vietnam and the Yinggehai–Song Hong Basin, South China Sea: *Geological Society of America Bulletin*, v. 131, no. 1–2, p. 191–204, <http://doi.org/10.1130/b32007.1>.

- Xie, Y., et al., 2016, Detrital zircon ages and reservoir source of the second member of the Huangliu Formation in the Yinggehai Basin [in Chinese with English abstract]: *Geotectonica et Metallogenia*, v. 40, no. 3, p. 517–530, <http://doi.org/10.16539/j.ddgzyckx.2016.03.009>.
- Xu, X., O'Reilly, S.Y., Griffin, W.L., Wang, X., Pearson, N.J., and He, Z., 2007, The crust of Cathaysia: Age, assembly and reworking of two terranes: *Precambrian Research*, v. 158, no. 1–2, p. 51–78, <https://doi.org/10.1016/j.precamres.2007.04.010>.
- Xu, Y., Sun, Q., Cai, G., Yin, X., and Chen, J., 2014a, The U–Pb ages and Hf isotopes of detrital zircons from Hainan Island, South China: implications for sediment provenance and the crustal evolution: *Environmental Earth Sciences*, v. 71, no. 4, p. 1619–1628, <https://doi.org/10.1007/s12665-013-2566-x>.
- Xu, Y., Sun, Q., Yi, L., Yin, X., Wang, A., Li, Y., and Chen, J., 2014b, Detrital zircons U-Pb age and Hf isotope from the western side of the Taiwan Strait: Implications for sediment provenance and crustal evolution of the northeast Cathaysia Block: *Diqiu Kexue Jikan*, v. 25, no. 4, p. 505–535, [https://doi.org/10.3319/TAO.2014.02.18.01\(TT\)](https://doi.org/10.3319/TAO.2014.02.18.01(TT)).
- Yan, Y., Carter, A., Palk, C., Brichau, S., and Hu, X.Q., 2011, Understanding sedimentation in the Song Hong-Yinggehai Basin, South China Sea: *Geochemistry Geophysics Geosystems*, v. 12, no. 6, Q06014, <https://doi.org/10.1029/2011GC003533>.
- Yan, Y., Yao, D., Tian, Z.-X., Huang, C.-Y., Dilek, Y., Clift, P.D., and Li, Z.-A., 2018a, Tectonic Topography Changes in Cenozoic East Asia: A Landscape Erosion-Sediment Archive in the South China Sea: *Geochemistry Geophysics Geosystems*, v. 19, no. 6, p. 1731–1750, <https://doi.org/10.1029/2017GC007356>.
- Yan, Y., Yao, D., Tian, Z.X., Huang, C.Y., Chen, W.H., Santosh, M., Yumul, G.P., Dimalanta, C.B., and Li, Z.A., 2018b, Zircon U-Pb chronology and Hf isotope from the Palawan-Mindoro Block, Philippines: Implication to provenance and tectonic evolution of the South China Sea: *Tectonics*, v. 37, no. 4, p. 1063–1076, <https://doi.org/10.1002/2017TC004942>.
- Zhang, X., Yan, Y., Huang, C.-Y., Chen, D., Shan, Y., Lan, Q., Chen, W., and Yu, M., 2014, Provenance analysis of the Miocene accretionary prism of the Hengchun Peninsula, southern Taiwan, and regional geological significance: *Journal of Asian Earth Sciences*, v. 85, p. 26–39, <https://doi.org/10.1016/j.jseaes.2014.01.021>.
- Zhang, X., Chung, S.-L., Lai, Y.-M., Ghani, A.A., Murtadha, S., Lee, H.-Y., and Hsu, C.-C., 2019, A 6000-km-long Neo-Tethyan arc system with coherent magmatic flare-ups and lulls in South Asia: *Geology*, v. 47, no. 6, p. 573–576, <https://doi.org/10.1130/G46172.1>.
- Zhang, X.C., Huang, C.Y., Wang, Y.J., Clift, P.D., Yan, Y., Fu, X.W., and Chen, D.F., 2017, Evolving Yangtze River reconstructed by detrital zircon U-Pb dating and petrographic analysis of Miocene marginal Sea sedimentary rocks of the Western Foothills and Hengchun Peninsula, Taiwan: *Tectonics*, v. 36, no. 4, p. 634–651, <https://doi.org/10.1002/2016TC004357>.
- Zhao, M., Shao, L., and Qiao, P., 2015, Characteristics of detrital zircon U-Pb geochronology of the Pearl River sands and its implication on provenances [in Chinese with English abstract]: *Journal of Tongji University (Natural Science)*, v. 43, no. 6, p. 915–923, <http://doi.org/10.11908/j.issn.0253-374x.2015.06.018>.



Figure S1

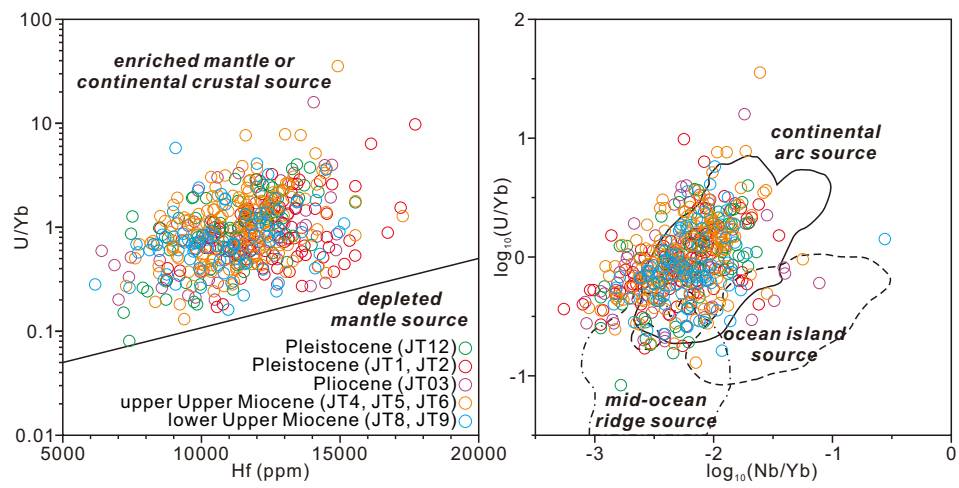

Supplement: Supplementary file 1 [file 1]
